# Supplementary material for: Timing of Favorable Conditions, Competition and Fertility Interact to Govern Recruitment of Invasive Chinese Tallow Tree in Stressful Environments
Source: PLOS journal article supplement (doi:10.1371/journal.pone.0071446), 2013-08-13
Supplement: S3 (10.1371/journal.pone.0071446.s003) [file journal.pone.0071446.s003]

**Table S2. Results of ANOVAs testing effects of experimental treatments on native plant abundance and performance.**

| factor | d.f. | pre-stress percent cover |               | final percent cover |                   | pre-stress max height |                   | final max height |                   | aboveground biomass |                   | Δ percent cover  |                   | Δ max height     |                   |
|--------|------|--------------------------|---------------|---------------------|-------------------|-----------------------|-------------------|------------------|-------------------|---------------------|-------------------|------------------|-------------------|------------------|-------------------|
|        |      | F <sub>199</sub>         | p             | F <sub>199</sub>    | p                 | F <sub>199</sub>      | p                 | F <sub>199</sub> | p                 | F <sub>199</sub>    | p                 | F <sub>199</sub> | p                 | F <sub>197</sub> | p                 |
| Window | 4    | 5.1                      | <b>0.0006</b> | 9.7                 | <b>&lt;0.0001</b> | 19.5                  | <b>&lt;0.0001</b> | 14.6             | <b>&lt;0.0001</b> | 10.2                | <b>&lt;0.0001</b> | 27.1             | <b>&lt;0.0001</b> | 11.2             | <b>&lt;0.0001</b> |
| Stress | 1    | 1.7                      | 0.20          | 60.9                | <b>&lt;0.0001</b> | 0.0                   | 0.92              | 2.8              | 0.09              | 4.5                 | <b>0.0351</b>     | 83.3             | <b>&lt;0.0001</b> | 3.8              | 0.05              |
| Fert   | 1    | 0.0                      | 0.90          | 0.3                 | 0.60              | 1.7                   | 0.19              | 0.4              | 0.55              | 2.6                 | 0.11              | 0.5              | 0.47              | 0.4              | 0.52              |
| W*S    | 4    | 1.5                      | 0.21          | 10.3                | <b>&lt;0.0001</b> | 1.1                   | 0.34              | 2.7              | <b>0.0336</b>     | 4.0                 | <b>0.0039</b>     | 3.6              | <b>0.0081</b>     | 3.5              | <b>0.0083</b>     |
| W*F    | 4    | 0.5                      | 0.74          | 1.5                 | 0.20              | 0.1                   | 0.97              | 1.4              | 0.24              | 1.6                 | 0.18              | 0.7              | 0.60              | 1.5              | 0.21              |
| S*F    | 1    | 1.2                      | 0.28          | 0.4                 | 0.51              | 0.1                   | 0.75              | 0.5              | 0.50              | 0.0                 | 0.93              | 0.6              | 0.45              | 0.2              | 0.65              |
| W*S*F  | 4    | 0.6                      | 0.65          | 2.6                 | <b>0.0397</b>     | 1.1                   | 0.38              | 1.7              | 0.16              | 1.1                 | 0.38              | 0.5              | 0.72              | 1.3              | 0.28              |

Treatments include window duration (W), stress type (S), fertilization (F) and their interactions. These tests only consider pots subject to the competition treatment because native plants were weeded from non-competition pots; hence competition is not considered as a factor here. Pre-stress and final native plant percent cover were arcsine transformed, pre-stress and final maximum native plant height were untransformed, aboveground native plant biomass was square root transformed, and absolute changes ( $\Delta$ ) in cover and maximum height during stress were untransformed for analyses.
